# Supplementary material for: Enrofloxacin Dose Optimization for the Treatment of Colibacillosis in Broiler Chickens Using a Drinking Behaviour Pharmacokinetic Model
Source: MDPI journal article supplement (doi:10.3390/antibiotics10050604), 2021-05-19
Supplement: s1 [file s1]

## SUPPLEMENTARY INFORMATION FILES

**S1. Table with secondary PK parameters of enrofloxacin in broilers and their associated standard error (SE), coefficient of variation (CV%) and 95% confidence intervals**

| <b>Secondary parameters</b>   | <b>Estimate</b> | <b>Units</b> | <b>SE</b> | <b>CV%</b> | <b>2.5% CI</b> | <b>97.5% CI</b> |
|-------------------------------|-----------------|--------------|-----------|------------|----------------|-----------------|
| $K_e$                         | 0.098           | 1/h          | 0.004     | 4.365      | 0.090          | 0.106           |
| $T_{max}$                     | 3.312           | h            | 0.142     | 4.290      | 3.033          | 3.591           |
| $AUC_{(0-inf)}$               | 21830.100       | h*ng/mL      | 1410.230  | 6.460      | 19061.749      | 24598.451       |
| $C_{max}$                     | 1546.870        | ng/mL        | 110.586   | 7.149      | 1329.784       | 1763.956        |
| $T_{1/2 \text{ absorption}}$  | 1.012           | h            | 0.076     | 7.496      | 0.863          | 1.161           |
| $T_{1/2 \text{ elimination}}$ | 7.069           | h            | 0.309     | 4.365      | 6.464          | 7.675           |

**Figure S2. Scatterplots of observed concentrations vs. IPRED**

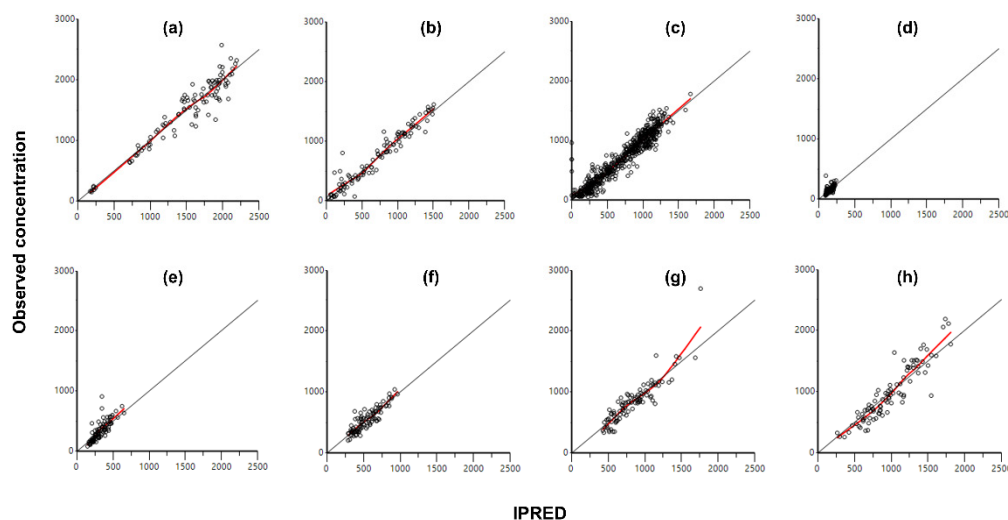

*Diagnostic scatterplots of the dependent variable (i.e. the observed concentrations) vs. the individually predicted plasma concentration values (IPRED) on arithmetic scale of the different treatment groups (a = IV, b = PO richly sampled, c = PO sparsely sampled, d = drinking water administration 2.5 mg/kg/24h, e = drinking water administration 5 mg/kg/24h; f = drinking water administration 10 mg/kg/24h, g = drinking water administration 15 mg/kg/24h obtained and h = drinking water administration 20 mg/kg/24h). The black circles represent the observed data, the full black lines are the lines of unity and the red line represents the LOESS line.*

**Figure S3. Scatterplots of observed concentrations vs. PRED**

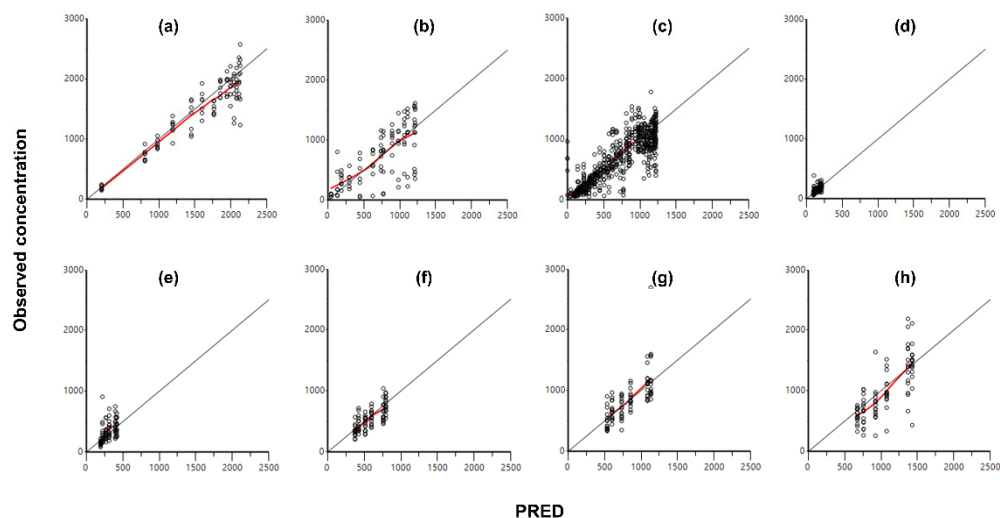

*Diagnostic scatterplots of the dependent variable (i.e. the observed concentrations) vs. the predicted plasma concentration values PRED) on arithmetic scale of the different treatment groups (a = IV, b = PO richly sampled, c = PO sparsely sampled, d = drinking water administration 2.5 mg/kg/24h, e = drinking water administration 5 mg/kg/24h; f = drinking water administration 10 mg/kg/24h, g = drinking water administration 15 mg/kg/24h obtained and h = drinking water administration 20 mg/kg/24h). The black circles represent the observed data, the full black lines are the lines of unity and the red line represents the LOESS line.*

**Figure S4. Scatterplots of CWRES vs. time post administration**

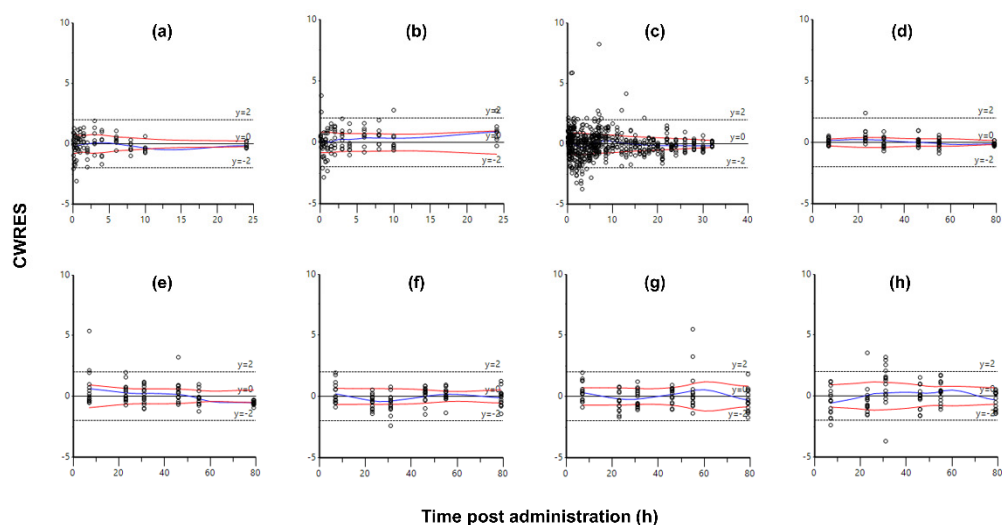

*Diagnostic scatterplots of the conditionally weighted residuals (CWRES) vs. time after dose (independent variable, IVAR) of the different treatment groups (a = IV, b = PO richly sampled, c = PO sparsely sampled, d = drinking water administration 2.5 mg/kg/24h, e = drinking water administration 5 mg/kg/24h; f = drinking water administration 10 mg/kg/24h, g = drinking water administration 15 mg/kg/24h obtained and h = drinking water administration 20 mg/kg/24h). Values of CWRES should be concentrated heavily between  $y = -2$  and  $y = 2$ . The blue LOESS lines give the overall tendency of the residuals and the red LOESS lines should not show any fanning.*

**S5. Table of selected quantiles of the PTA analysis of the different doses for a range of MIC values.** *The dose where 90% of the population (90% quantile) reached the PK/PD target (fAUC(48-72h)/MIC  $\geq$  100) for a particular MIC value was considered effective.*

|                                     | MIC ( $\mu$ g/mL) | Quantiles (%) |          |          |         |         |
|-------------------------------------|-------------------|---------------|----------|----------|---------|---------|
|                                     |                   | 25            | 50       | 75       | 90      | 95      |
| Dose 2.5 mg/kg/24h: AUC(48-72)/MIC  | 0.032             | 130.774       | 116.699  | 99.793   | 85.769  | 76.598  |
|                                     | 0.064             | 66.956        | 59.750   | 51.094   | 43.914  | 39.218  |
|                                     | 0.125             | 33.478        | 29.875   | 25.547   | 21.957  | 19.609  |
|                                     | 0.25              | 16.739        | 14.937   | 12.773   | 10.978  | 9.805   |
|                                     | 0.5               | 8.370         | 7.469    | 6.387    | 5.489   | 4.902   |
| Dose 5 mg/kg/24h: AUC(48-72)/MIC    | 0.032             | 256.270       | 225.075  | 196.629  | 169.099 | 154.245 |
|                                     | 0.064             | 131.210       | 115.239  | 100.674  | 86.578  | 78.974  |
|                                     | 0.125             | 65.605        | 57.619   | 50.337   | 43.289  | 39.487  |
|                                     | 0.25              | 32.803        | 28.810   | 25.169   | 21.645  | 19.743  |
|                                     | 0.5               | 16.401        | 14.405   | 12.584   | 10.822  | 9.872   |
| Dose 7.5 mg/kg/24h: AUC(48-72)/MIC  | 0.032             | 378.033       | 333.488  | 287.445  | 253.363 | 229.044 |
|                                     | 0.064             | 193.553       | 170.746  | 147.172  | 129.722 | 117.270 |
|                                     | 0.125             | 96.776        | 85.373   | 73.586   | 64.861  | 58.635  |
|                                     | 0.25              | 48.388        | 42.686   | 36.793   | 32.430  | 29.318  |
|                                     | 0.5               | 24.194        | 21.343   | 18.396   | 16.215  | 14.659  |
| Dose 10 mg/kg/24h: AUC(48-72)/MIC   | 0.032             | 501.455       | 438.585  | 365.854  | 310.930 | 278.253 |
|                                     | 0.064             | 513.490       | 449.111  | 374.635  | 318.393 | 284.931 |
|                                     | 0.125             | 128.372       | 112.278  | 93.659   | 79.598  | 71.233  |
|                                     | 0.25              | 64.186        | 56.139   | 46.829   | 39.799  | 35.616  |
|                                     | 0.5               | 32.093        | 28.069   | 23.415   | 19.900  | 17.808  |
| Dose 12.5 mg/kg/24h: AUC(48-72)/MIC | 0.032             | 606.548       | 521.257  | 461.387  | 395.179 | 353.876 |
|                                     | 0.064             | 310.553       | 266.884  | 236.230  | 202.332 | 181.185 |
|                                     | 0.125             | 155.276       | 133.442  | 118.115  | 101.166 | 90.592  |
|                                     | 0.25              | 77.638        | 66.721   | 59.057   | 50.583  | 45.296  |
|                                     | 0.5               | 38.819        | 33.360   | 29.529   | 25.291  | 22.648  |
| Dose 15 mg/kg/24h: AUC(48-72)/MIC   | 0.032             | 713.504       | 624.578  | 545.101  | 464.987 | 431.907 |
|                                     | 0.064             | 730.628       | 639.568  | 558.184  | 476.146 | 442.272 |
|                                     | 0.125             | 182.657       | 159.892  | 139.546  | 119.037 | 110.568 |
|                                     | 0.25              | 91.328        | 79.946   | 69.773   | 59.518  | 55.284  |
|                                     | 0.5               | 45.664        | 39.973   | 34.886   | 29.759  | 27.642  |
| Dose 20 mg/kg/24h: AUC(48-72)/MIC   | 0.032             | 917.950       | 799.749  | 680.981  | 574.661 | 519.756 |
|                                     | 0.064             | 469.991       | 409.472  | 348.662  | 294.226 | 266.115 |
|                                     | 0.125             | 234.995       | 204.736  | 174.331  | 147.113 | 133.058 |
|                                     | 0.25              | 117.498       | 102.368  | 87.166   | 73.557  | 66.529  |
|                                     | 0.5               | 58.749        | 51.184   | 43.583   | 36.778  | 33.264  |
| Dose 30 mg/kg/24h: AUC(48-72)/MIC   | 0.032             | 1260.385      | 1077.652 | 886.389  | 743.419 | 632.468 |
|                                     | 0.064             | 645.317       | 551.758  | 453.831  | 380.631 | 323.823 |
|                                     | 0.125             | 322.658       | 275.879  | 226.916  | 190.315 | 161.912 |
|                                     | 0.25              | 161.329       | 137.939  | 113.458  | 95.158  | 80.956  |
|                                     | 0.5               | 80.665        | 68.970   | 56.729   | 47.579  | 40.478  |
| Dose 50 mg/kg/24h: AUC(48-72)/MIC   | 0.032             | 1670.091      | 1358.097 | 1042.043 | 799.835 | 672.603 |
|                                     | 0.064             | 855.087       | 695.346  | 533.526  | 409.515 | 344.373 |
|                                     | 0.125             | 427.543       | 347.673  | 266.763  | 204.758 | 172.186 |
|                                     | 0.25              | 213.772       | 173.836  | 133.382  | 102.379 | 86.093  |
|                                     | 0.5               | 106.886       | 86.918   | 66.691   | 51.189  | 43.047  |

**S6. Table of the sampling design of the sparsely sampled enrofloxacin PO administration trial**

| Experiment 1 (Week 1: 27d of age) |       |       |       |       |       |       |       |       |       |      |     |     |     |     |     |
|-----------------------------------|-------|-------|-------|-------|-------|-------|-------|-------|-------|------|-----|-----|-----|-----|-----|
|                                   | 15min | 35min | 65min | 1.25h | 2.5h  | 3h    | 4.25h | 4.75h | 5h    | 9h   | 14h | 15h | 18h | 20h | 24h |
| Group 1                           |       |       | X     |       | X     |       |       |       | X     | X    |     |     | X   |     |     |
| Group 2                           |       | X     |       |       |       | X     | X     |       |       |      | X   |     |     |     | X   |
| Group 3                           | X     |       |       | X     |       |       |       | X     |       |      |     | X   |     | X   |     |
| Experiment 2 (Week 1: 29d of age) |       |       |       |       |       |       |       |       |       |      |     |     |     |     |     |
|                                   | 10min | 30min | 45min | 2h    | 2.75h | 3.25h | 4.5h  | 5.25h | 5.5h  | 8h   | 10h | 11h | 19h | 26h | 32h |
| Group 4                           |       | X     |       |       | X     |       |       |       | X     | X    |     |     |     |     | X   |
| Group 5                           |       |       | X     | X     |       |       | X     |       |       |      |     | X   | X   |     |     |
| Group 6                           | X     |       |       |       |       | X     |       | X     |       |      | X   |     |     | X   |     |
| Experiment 3 (Week 2: 34d of age) |       |       |       |       |       |       |       |       |       |      |     |     |     |     |     |
|                                   | 20min | 40min | 50min | 1.75h | 2.25h | 3.5h  | 4h    | 6.25h | 6.5h  | 7.5h | 12h | 13h | 17h | 22h | 30h |
| Group 7                           |       |       | X     | X     |       |       |       | X     |       |      |     | X   |     |     | X   |
| Group 8                           |       | X     |       |       | X     |       | X     |       |       |      | X   |     | X   |     |     |
| Group 9                           | X     |       |       |       |       | X     |       |       | X     | X    |     |     |     | X   |     |
| Experiment 4 (Week 2: 36d of age) |       |       |       |       |       |       |       |       |       |      |     |     |     |     |     |
|                                   | 5min  | 25min | 55min | 1h    | 1.75h | 3.75h | 5.75h | 6h    | 6.75h | 7h   | 8.5 | 16h | 21h | 23h | 28h |
| Group 10                          |       |       | X     |       | X     |       |       | X     |       |      | X   |     |     |     | X   |
| Group 11                          |       | X     |       |       |       | X     | X     |       |       | X    |     |     | X   |     |     |
| Group 12                          | X     |       |       | X     |       |       |       |       | X     |      |     | X   |     | X   |     |
